# Supplementary material
Source: Springer Nature journal article supplement (https://www.springermedizin.de/resource/supplementary/12894_2005_67_MOESM2_ESM.pdf/9513848)

**A**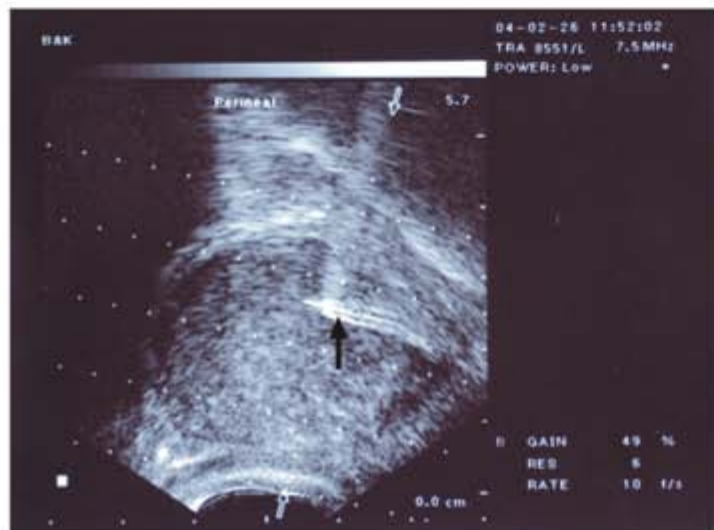**B**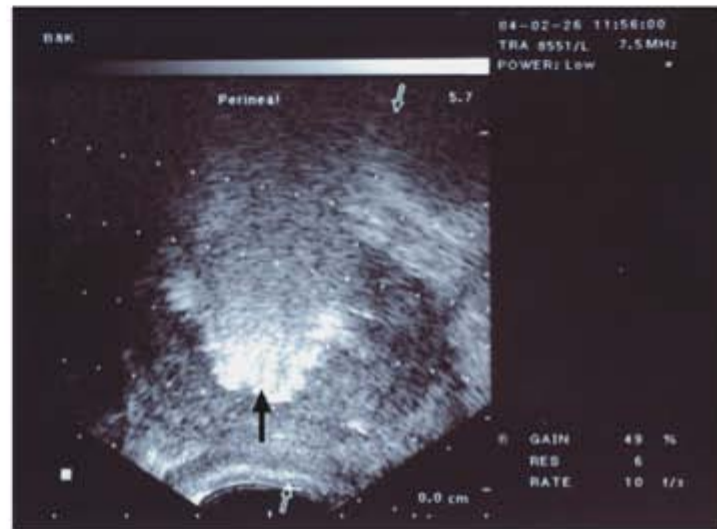

Supplement: MOESM2 [file 9513848]
